# Supplementary material
Source: PubMed Central journal article supplement (PMC3987920)
Supplement: NIHMS538466-supplement-1_si_001.pdf [file NIHMS538466-supplement-1_si_001.pdf]

# Variational Optimization of an All-Atom EEF1 Implicit Solvent to Match Explicit Solvent Simulation Data

Sandro Bottaro,<sup>†,§</sup> Kresten Lindorff-Larsen,<sup>\*,†</sup> and Robert B. Best<sup>\*,‡</sup>

*Department of Biology, University of Copenhagen, Copenhagen, Denmark, Department of Chemistry, University of Cambridge, Lensfield Road, Cambridge CB2 1EW, United Kingdom, and Laboratory of Chemical Physics, National Institute of Diabetes and Digestive and Kidney Diseases, National Institutes of Health, 9000 Rockville Pike, U.S.A.*

E-mail: lindorff@bio.ku.dk; robertbe@helix.nih.gov

## Supporting Information

---

\*To whom correspondence should be addressed

<sup>†</sup>University of Copenhagen

<sup>‡</sup>University of Cambridge

<sup>¶</sup>National Institutes of Health

<sup>§</sup>Present Address: SISSA-Scuola Internazionale Superiore di Studi Avanzati, Trieste, Italy

Table 1: Solvation parameters used in EEF1-SB. The volume (in  $\text{\AA}^3$ ) is given by the van der Waals volume minus the overlap with the volume of covalently bonded atoms. The values of  $\Delta G^{\text{ref}}$  ( $\text{kcal mol}^{-1}$ ),  $\Delta H$  ( $\text{kcal mol}^{-1}$ ), and  $\Delta C_p$  ( $\text{kcal mol}^{-1} \text{K}^{-1}$ ) are taken from the original EEF1 model. The correlation length  $\lambda$  is  $3.5 \text{\AA}$ , except for atoms in ionic groups, for which a value of  $\lambda = 6 \text{\AA}$  is used.

| Atom type | Volume | $\Delta G^{\text{ref}}$ | $\Delta G^{\text{free}}$ | $\Delta H$ | $\Delta C_p$ | $\lambda$ |
|-----------|--------|-------------------------|--------------------------|------------|--------------|-----------|
| C         | 14.720 | 0.000                   | 0.000                    | 0.000      | 0.0          | 3.5       |
| CD        | 14.720 | 0.000                   | 0.000                    | 0.000      | 0.0          | 3.5       |
| CT1       | 11.507 | -0.187                  | -0.187                   | 0.876      | 0.0          | 3.5       |
| CT2       | 18.850 | 0.372                   | 0.372                    | -0.610     | 18.6         | 3.5       |
| CT2A      | 18.666 | 0.372                   | 0.372                    | -0.610     | 18.6         | 3.5       |
| CT3       | 27.941 | 1.089                   | 1.089                    | -1.779     | 35.6         | 3.5       |
| CPH1      | 5.275  | 0.057                   | 0.080                    | -0.973     | 6.9          | 3.5       |
| CPH2      | 11.796 | 0.057                   | 0.080                    | -0.973     | 6.9          | 3.5       |
| CPT       | 4.669  | -0.890                  | -0.890                   | 2.220      | 6.9          | 3.5       |
| CY        | 10.507 | -0.890                  | -0.890                   | 2.220      | 6.9          | 3.5       |
| CP1       | 25.458 | -0.187                  | -0.187                   | 0.876      | 0.0          | 3.5       |
| CP2       | 19.880 | 0.372                   | 0.372                    | -0.610     | 18.6         | 3.5       |
| CP3       | 26.731 | 0.372                   | 0.372                    | -0.610     | 18.6         | 3.5       |
| CC        | 16.539 | 0.000                   | 0.000                    | 0.000      | 0.0          | 3.5       |
| CAI       | 18.249 | 0.057                   | 0.057                    | -0.973     | 6.9          | 3.5       |
| CA        | 18.249 | 0.057                   | 0.057                    | -0.973     | 6.9          | 3.5       |
| N         | 0.000  | -1.000                  | -1.000                   | -1.250     | 8.8          | 3.5       |
| NR1       | 15.273 | -5.950                  | -5.950                   | -9.059     | -8.8         | 3.5       |
| NR2       | 15.111 | -3.820                  | -3.820                   | -4.654     | -8.8         | 3.5       |
| NR3       | 15.071 | -5.950                  | -5.950                   | -9.059     | -8.8         | 3.5       |
| NH1       | 10.197 | -5.950                  | -5.950                   | -9.059     | -8.8         | 3.5       |
| NH2       | 18.182 | -5.950                  | -5.950                   | -9.059     | -8.8         | 3.5       |
| NH3       | 18.817 | -20.000                 | -20.000                  | -25.000    | -18.0        | 6.0       |
| NC2       | 18.215 | -10.000                 | -10.000                  | -12.000    | -7.0         | 6.0       |
| NY        | 12.001 | -5.950                  | -5.950                   | -9.059     | -8.8         | 3.5       |
| NP        | 4.993  | -20.000                 | -20.000                  | -25.000    | -18.0        | 6.0       |
| O         | 11.772 | -5.330                  | -5.330                   | -5.787     | -8.8         | 3.5       |
| OB        | 11.694 | -5.330                  | -5.330                   | -5.787     | -8.8         | 3.5       |
| OC        | 12.003 | -10.000                 | -10.000                  | -12.000    | -9.4         | 6.0       |
| OH1       | 15.528 | -5.920                  | -5.920                   | -9.264     | -11.2        | 3.5       |
| OS        | 6.774  | -2.900                  | -2.900                   | -3.150     | -4.8         | 3.5       |
| S         | 20.703 | -3.240                  | -3.240                   | -4.475     | -39.9        | 3.5       |
| SM        | 21.306 | -3.240                  | -3.240                   | -4.475     | -39.9        | 3.5       |

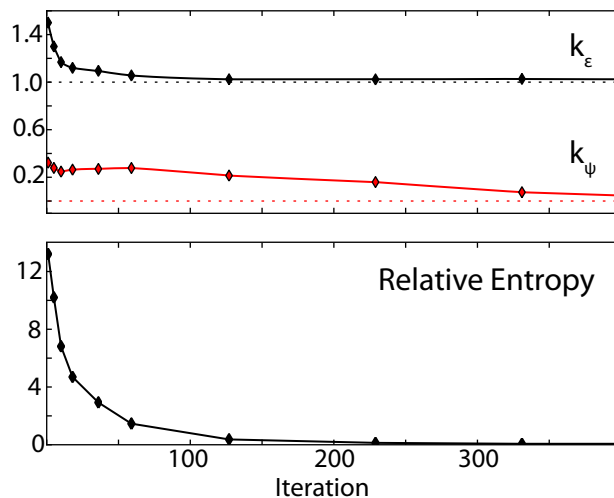

Figure 1: Validation of the relative entropy approach. We validate the relative entropy procedure by performing a reference molecular dynamics simulations on the  $(AAQAA)_3$  peptide using the unoptimized EEF1-SB parameters. Then, we arbitrarily modified the values of  $k_\epsilon$  and  $k_\psi$  and performed a relative entropy minimization. Upper panel: convergence behaviour of the two parameters  $k_\epsilon$  and  $k_\psi$  (solid lines). At the end of the minimization, the parameters used in a reference simulation (dotted lines) are correctly recovered. The relative entropy calculated at each step of the procedure is shown in the bottom panel. Each sampling step (shown with points) is followed by a number of reweighting steps, where the relative entropy and the parameter update are estimated using perturbation techniques (see text).

Table 2: Partial atomic charges for ionic groups in EEF1-SB

| Residue | Atom    | Charge | Residue     | Atom        | Charge |
|---------|---------|--------|-------------|-------------|--------|
| ARG     | CD      | -0.30  | HSP         | CB          | -0.10  |
|         | HD1/HD2 | 0.05   |             | HB1/HB2     | 0.05   |
|         | NE      | -0.28  |             | CD2         | 0.05   |
|         | HE      | 0.12   |             | HD2         | 0.00   |
|         | CZ      | -0.20  |             | CG          | 0.05   |
|         | NH1/NH2 | -0.121 |             | NE2/ND1     | -0.55  |
|         | HH1/HH2 | 0.2005 |             | HE2/HD1     | 0.45   |
| ASP     | CB      | -0.28  | CE1         | 0.10        |        |
|         | HB1/HB2 | 0.14   | HE1         | 0.00        |        |
|         | HB1/HB2 | 0.14   | LYS         | CE          | 0.00   |
|         | HB1/HB2 | 0.14   |             | HE1/HE2     | 0.00   |
| GLU     | CG      | -0.28  |             | NZ          | -0.90  |
|         | HG1/HG2 | 0.14   | HZ1/HZ2/HZ3 | 0.30        |        |
|         | CD      | 1.00   | NTER        | N           | -0.90  |
|         | OE1/OE2 | -0.50  |             | HT1/HT2/HT3 | 0.20   |
| GLP     | CG      | -0.21  |             | HA          | 0.10   |
|         | HG1/HG2 | 0.09   | CA          | 0.20        |        |
|         | CD      | 0.75   | CTER        | C           | 1.00   |
|         | OE1     | -0.55  |             | OT1/OT2     | -0.50  |
|         | OE2     | -0.61  |             |             |        |
|         | HE2     | 0.44   |             |             |        |

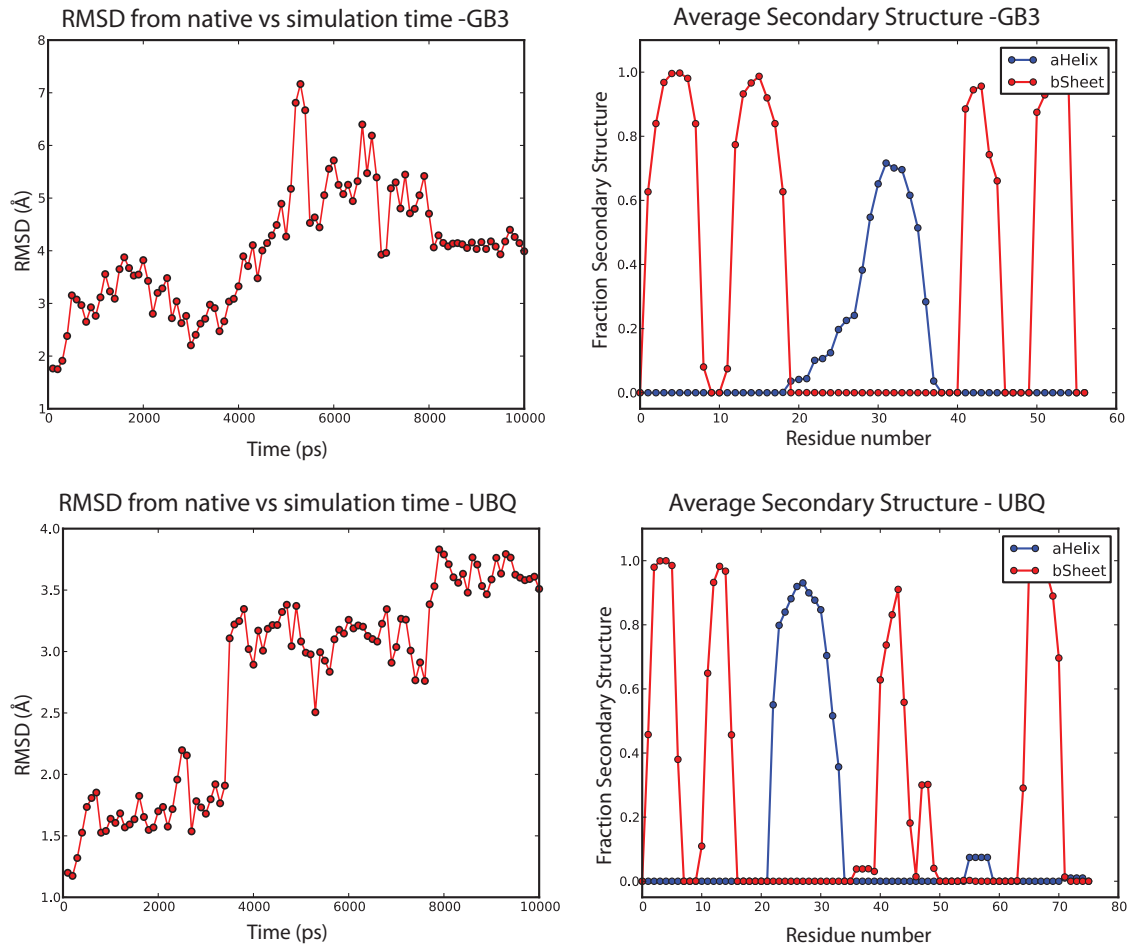

Figure 2: RMSD from native vs simulation time and average secondary structure content of GB3 and Ubiquitin using EEF1-SB.

Table 3:  $J$ -couplings for 19-residue peptide derived from hen lysozyme (HEWL19). The table gives the scalar couplings measured experimentally and calculated from the 298 K replica of REMD simulations using the “DFT2” Karplus relation, as described in the main text.

| Residue/ $J$                        | $J_{\text{expt}}$ | $J$ (C36/explicit) | $J$ (EEF1-<br>unopt.) | $J$ (EEF1-SB) | $J$ (FACTS) | $J$ (SCPISM) |
|-------------------------------------|-------------------|--------------------|-----------------------|---------------|-------------|--------------|
| A9 $^1J_{\text{NC}\alpha}$          | 10.54             | 10.40              | 9.88                  | 10.80         | 9.75        | 9.79         |
| A10 $^1J_{\text{NC}\alpha}$         | 10.58             | 10.35              | 9.60                  | 10.53         | 9.52        | 9.81         |
| A11 $^1J_{\text{NC}\alpha}$         | 10.57             | 10.40              | 10.23                 | 10.65         | 9.73        | 9.80         |
| A10 $^2J_{\text{NC}\alpha}$         | 7.24              | 7.02               | 6.51                  | 7.25          | 6.29        | 6.30         |
| A11 $^2J_{\text{NC}\alpha}$         | 7.02              | 6.91               | 7.20                  | 6.76          | 6.74        | 6.24         |
| A12 $^2J_{\text{NC}\alpha}$         | 7.17              | 7.06               | 5.87                  | 6.95          | 6.33        | 6.25         |
| A9 $^3J_{\text{H}\alpha\text{C}}$   | 2.06              | 1.93               | 3.14                  | 2.62          | 1.08        | 1.18         |
| A10 $^3J_{\text{H}\alpha\text{C}}$  | 1.72              | 2.10               | 6.33                  | 2.50          | 0.53        | 1.27         |
| A11 $^3J_{\text{H}\alpha\text{C}}$  | 2.20              | 2.32               | 2.95                  | 2.59          | 0.90        | 1.26         |
| A9 $^3J_{\text{HNC}}$               | 1.39              | 1.03               | 1.11                  | 1.38          | 0.63        | 0.63         |
| A10 $^3J_{\text{HNC}}$              | 1.33              | 0.88               | 1.10                  | 0.88          | 1.86        | 0.55         |
| A11 $^3J_{\text{HNC}}$              | 1.09              | 0.97               | 0.31                  | 0.93          | 0.91        | 0.58         |
| A9 $^3J_{\text{HNC}\beta}$          | 2.26              | 2.77               | 0.57                  | 1.34          | 3.83        | 3.72         |
| A10 $^3J_{\text{HNC}\beta}$         | 2.19              | 2.86               | 2.09                  | 1.80          | 3.81        | 3.69         |
| A11 $^3J_{\text{HNC}\beta}$         | 2.21              | 2.73               | 1.61                  | 1.57          | 3.88        | 3.69         |
| A9 $^3J_{\text{H}\text{NH}\alpha}$  | 5.18              | 6.15               | 10.26                 | 7.90          | 4.88        | 5.11         |
| A10 $^3J_{\text{H}\text{NH}\alpha}$ | 5.10              | 6.19               | 6.15                  | 8.13          | 2.55        | 5.34         |
| A11 $^3J_{\text{H}\text{NH}\alpha}$ | 5.67              | 6.23               | 9.85                  | 8.47          | 4.22        | 5.29         |
| A10 $^3J_{\text{H}\text{NH}\alpha}$ | 0.46              | 0.37               | 0.37                  | 0.53          | 0.10        | 0.16         |
| A11 $^3J_{\text{H}\text{NH}\alpha}$ | 0.43              | 0.38               | 0.34                  | 0.49          | 0.10        | 0.16         |
| A12 $^3J_{\text{H}\text{NH}\alpha}$ | 0.43              | 0.41               | 0.48                  | 0.54          | 0.12        | 0.16         |
